# Supplementary material
Source: publisher figshare collection journal article supplement (https://gsapubs.figshare.com/ndownloader/files/22743800)
Supplement: Supplementary file 1 [file 22743800]

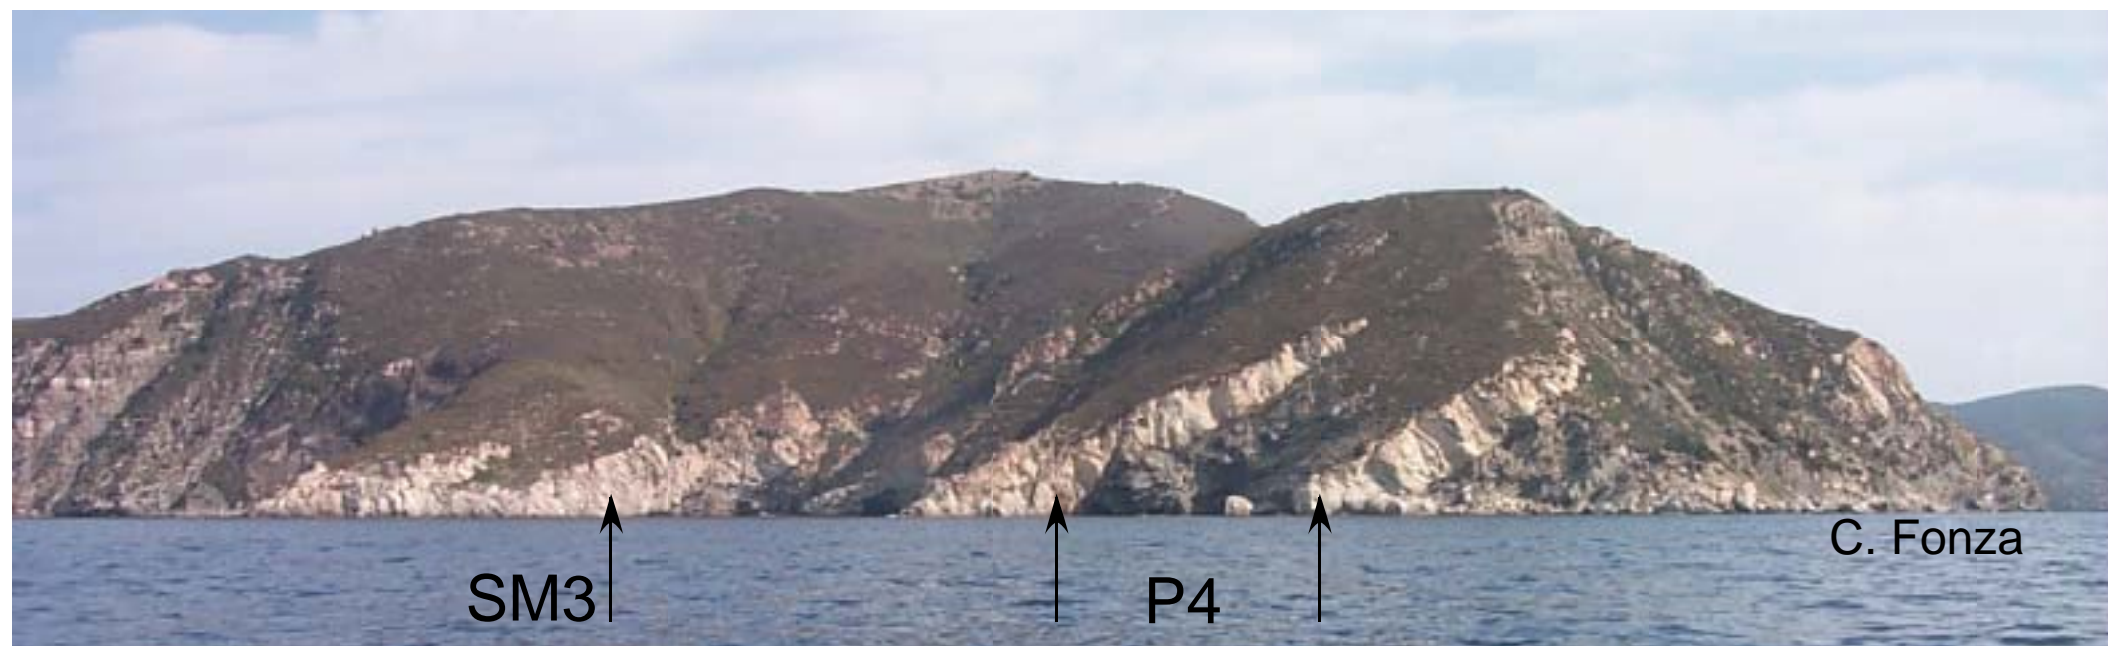

Fig. DR1. View from the south of the WNW-ESE oriented cliff bounding to the north the gulf of Marina di Campo. The shooting point is reported on Fig. 1. SM3 and P4 refers to the laccolith layers as reported in Table 1 and Fig. 1.
